# Supplementary material for: Magnetic field coupling microfluidic synthesis of diluted magnetic semiconductor quantum dots: the case of Co doping ZnSe quantum dots
Source: Royal Society of Chemistry journal article supplement (doi:10.1039/d0tc06026g), 2021-01-01
Supplement: d0tc06026g1.pdf [file d0tc06026g1.pdf]

**Supporting Information for**

**Magnetic Field Coupling Microfluidic Synthesis of Diluted Magnetic Semiconductor Quantum Dots:**

**the Case of Co doping ZnSe Quantum Dots**

Xiaoxiong Zhao,<sup>†a</sup> Hongxia Liang,<sup>†a</sup> Yonggang Chen,<sup>b</sup> Xinhua Chen,<sup>c</sup> Weiwei Zhang,<sup>a</sup> Junmei Wang,<sup>a</sup>

Guangqing Zhang,<sup>a</sup> Vladimir I Belotelov<sup>\*d,e</sup> and Yujun Song<sup>\*a</sup>

<sup>a</sup> Center for Modern Physics Technology, School of Mathematics and Physics, University of Science & Technology Beijing, Beijing 100083, China;

<sup>b</sup> Zhejiang Key Laboratory for Pulsed Power Technology Translational Medicine, Hangzhou 310000, China;

<sup>c</sup> Department of Hepatobiliary and Pancreatic Surgery, The First Affiliated Hospital School of Medicine, Zhejiang University Key Laboratory of Combined Multi-organ Transplantation Ministry of Public Health Collaborative Innovation Center for Diagnosis and Treatment of Infectious Diseases, Hangzhou 310003, China.

<sup>d</sup> Russian Quantum Center, Moscow 143025, Russia.

<sup>e</sup> Lomonosov Moscow State University, Moscow 119991, Russia.

† Contribution to this article equally.

\* Corresponding author: Y. S., songyj@ustb.edu.cn; V.I.B., belotelov@physics.msu.ru

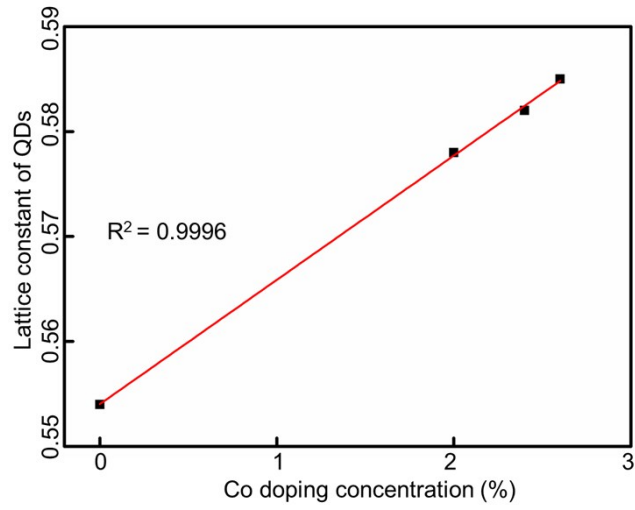

**Fig. S1.** The linear relationship of the Co doping concentration and lattice constant.

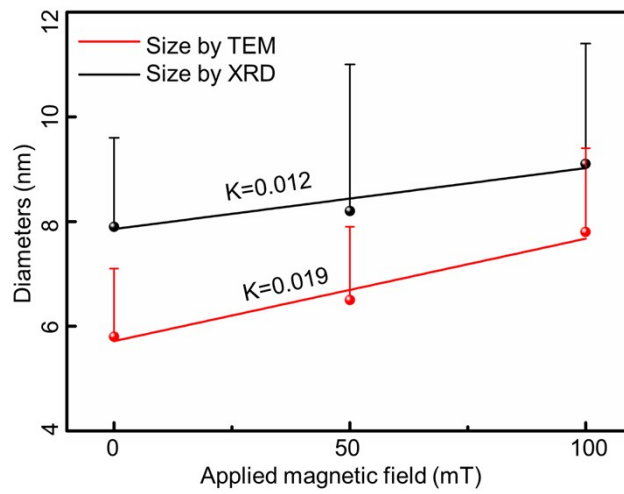

**Fig. S2.** The relationship between the magnetic field and the particle size.

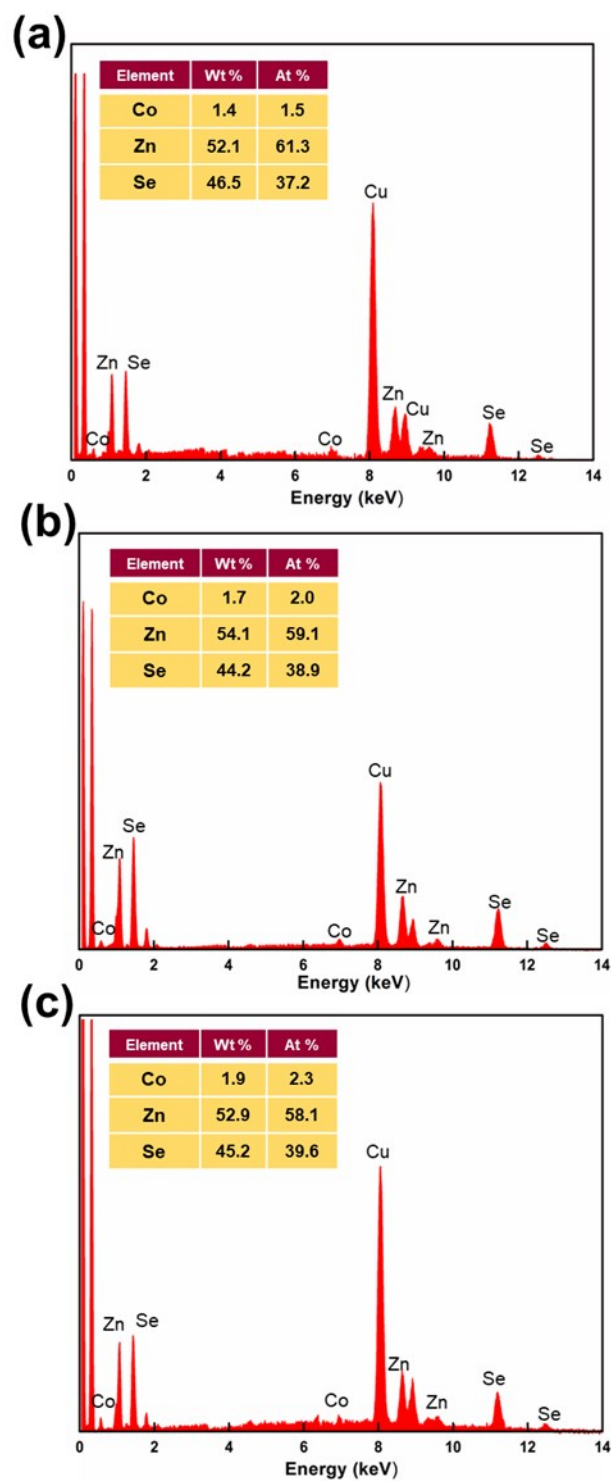

**Fig. S3.** EDS spectra of the ZnCoSe QDs synthesized at (a) 0 mT, (b) 50 mT, and (c) 100 mT.

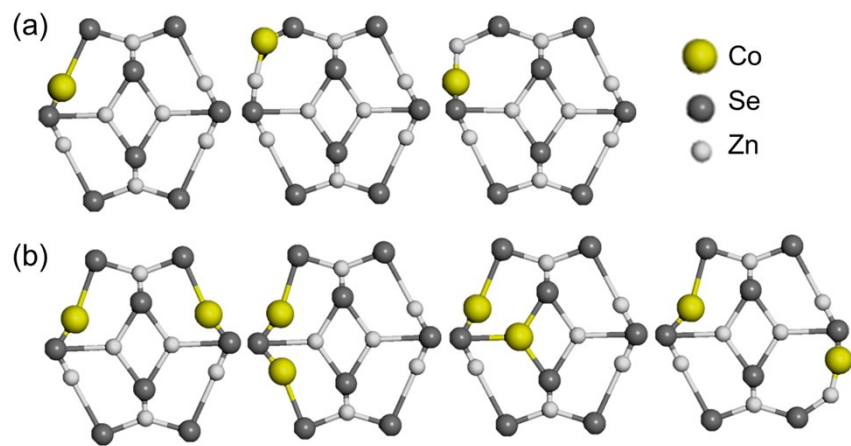

**Fig. S4.** Simulated schematic diagram of the Co single doping (a) and double doping (b) into ZnSe.

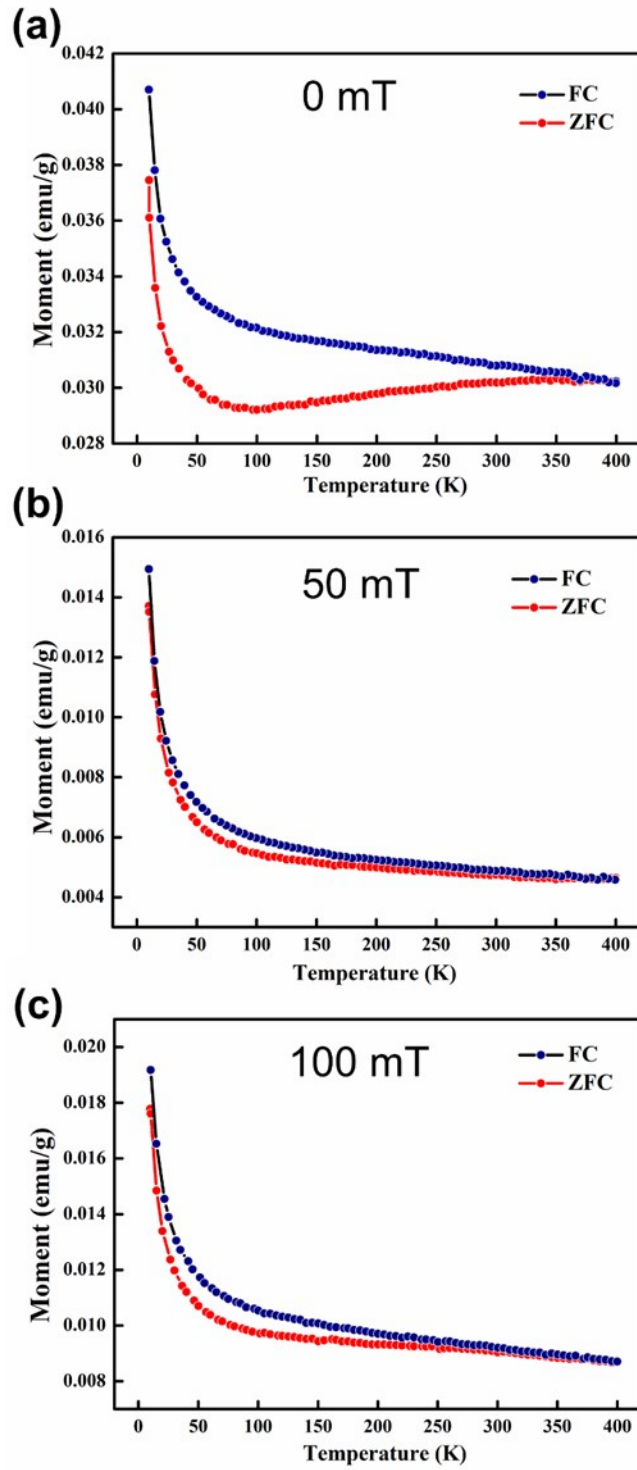

**Fig. S5.** The ZFC-FC curves of the ZnCoSe QDs synthesized at (a) 0 mT, (b) 50 mT, and (c) 100 mT.

**Table S1**

Systematic analysis of randomly selected lots of particles from TEM

| Sample           | Number | Mean | Standard deviation | Minimum | Median | Maximum |
|------------------|--------|------|--------------------|---------|--------|---------|
| ZnSe             | 100    | 4.9  | 1.4                | 2.2     | 4.9    | 9.3     |
| ZnCoSe<br>0 mT   | 100    | 5.8  | 1.3                | 2.4     | 5.6    | 9.5     |
| ZnCoSe<br>50 mT  | 100    | 6.5  | 1.4                | 2.5     | 6.3    | 9.9     |
| ZnCoSe<br>100 mT | 100    | 7.6  | 1.6                | 2.7     | 7.0    | 10.1    |

**Table S2**

ICP, EDS, and XPS methods used to test the ratio of Co: Zn in the ZnCoSe QDs synthesized at 0 mT, 50 mT, and 100 mT

|     | Element  | ZnCoSe<br>0 mT       | Co:Zn                          | ZnCoSe<br>50 mT      | Co:Zn                          | ZnCoSe<br>100 mT     | Co:Zn                          |
|-----|----------|----------------------|--------------------------------|----------------------|--------------------------------|----------------------|--------------------------------|
| EDS | Zn       | Wt 52.1%<br>At 61.3% | Wt<br>2.7:100<br>At<br>2.4:100 | Wt 54.1%<br>At 59.1% | Wt<br>3.1:100<br>At<br>3.4:100 | Wt 52.9%<br>At 58.1% | Wt<br>3.6:100<br>At<br>4.0:100 |
|     | Se       | Wt 46.5%<br>At 37.2% |                                | Wt 44.2%<br>At 38.9% |                                | Wt 45.2%<br>At 39.6% |                                |
|     | Co       | Wt 1.4%<br>At 1.5%   |                                | Wt 1.7%<br>At 2.0%   |                                | Wt 1.9%<br>At 2.3%   |                                |
| ICP | Zn       | 28.1%                | 2.1:100                        | 23.9%                | 2.5:100                        | 23.9%                | 2.7:100                        |
|     | Se       | 28.6%                |                                | 20.9%                |                                | 24.5%                |                                |
|     | Co       | 0.6%                 |                                | 0.6%                 |                                | 0.7%                 |                                |
|     | Organics | 42.7%                |                                | 54.6%                |                                | 51.0%                |                                |
| XPS | Zn       | Wt 16.5%<br>At 5.1%  | Wt<br>2.0:100<br>At<br>2.2:100 | Wt 12.4%<br>At 3.5%  | Wt<br>2.3:100<br>At<br>2.6:100 | Wt 15.2%<br>At 4.5%  | Wt<br>2.5:100<br>At<br>2.7:100 |
|     | Se       | Wt 26.2%<br>At 6.7%  |                                | Wt 23.0%<br>At 5.3%  |                                | Wt 24.2%<br>At 5.9%  |                                |
|     | Co       | Wt 0.33%<br>At 0.11% |                                | Wt 0.29%<br>At 0.09% |                                | Wt 0.38%<br>At 0.12% |                                |
|     | C        | Wt 50.6%<br>At 80.8% |                                | Wt 56.4%<br>At 81.9% |                                | Wt 53.8%<br>At 82.2% |                                |
|     | O        | Wt 6.4%<br>At 7.3%   |                                | Wt 7.9%<br>At 9.2%   |                                | Wt 6.4%<br>At 7.3%   |                                |

**Table S3**

Band gap of the ZnSe QDs and ZnCoSe QDs synthesized at 0 mT, 50 mT, and 100 mT calculated using the effective mass approximation theory equation

| Sample | Magnetic field | Average sizes by<br>TEM (nm) | Band gap (eV) |
|--------|----------------|------------------------------|---------------|
| ZnSe   | 0 mT           | $4.8 \pm 0.7$                | 3.06          |
| ZnCoSe | 0 mT           | $5.8 \pm 0.7$                | 2.93          |
| ZnCoSe | 50 mT          | $6.5 \pm 0.7$                | 2.86          |
| ZnCoSe | 100 mT         | $7.6 \pm 0.7$                | 2.81          |



## The flow and Navier-Stokes fluid mechanics equations

In this article are expressed as:

$$\nabla \cdot \vec{u} = 0$$

$$\rho \frac{\partial \vec{u}}{\partial t} + \rho(\vec{u} \cdot \nabla)\vec{u} = \vec{F} - \nabla \cdot P + \eta \nabla^2 \vec{u} \quad (1)$$

where  $\vec{u}$  is the fluid's velocity vector,  $\rho$  is the fluid's density,  $t$  is the time,  $P$  is the pressure,  $\eta$  is the fluid's dynamic viscosity,  $\nabla \cdot P$  is the force caused by the pressure gradient,  $\eta \nabla^2 \vec{u}$  is the friction generated by the viscosity, and  $\vec{F}$  is the external force acting on the fluid. In the three samples at 0 mT, 50 mT, and 100 mT, only  $\vec{F}$  was different. For the force that the samples were subjected to in the microsomal channel, there were generally magnetization forces caused by magnetic field gradients, Lorentz forces, movement-induced viscous drag, self-gravity, and buoyancy, which were different in the three samples and played an important role in the magnetization force caused by the magnetic field gradient and Lorentz force. In our system, the relationship between the force on the fluid and the applied magnetic field is illustrated by the following equations:

$$\vec{F} = \frac{1}{2} \nabla \left[ H^2 \rho \left( \frac{\partial \mu}{\partial \rho} \right)_T \right] - \frac{1}{2} H^2 \nabla \mu + \mu [\vec{J} \times \vec{H}] \quad (2)$$

The ferromagnetism substance is expressed as :

$$\vec{F} = \frac{1}{2} \mu \rho \chi_g \nabla H^2 + \mu [\vec{J} \times \vec{H}] = \vec{F}_m + \vec{F}_L \quad (3)$$
